# Supplementary material for: Nuances of Whitefly Vector–Crinivirus Interactions Revealed in the Foregut Retention and Transmission of Lettuce Chlorosis Virus by Two Bemisia tabaci Cryptic Species
Source: MDPI journal article supplement (doi:10.3390/v13081578), 2021-08-10
Supplement: s1 [file s1]

**Table S1:** Comparison of the yield and concentration of GH-LCV virions subjected to the VRT assays in this study.

| % TX-100 <sup>1</sup><br>(v/v) | Virus yield (ng/g tissue <sup>2</sup> ) |       |       |       |        | Ave.<br>yield | Ave.<br>concentration<br>(ng/μl <sup>-1</sup> ) |
|--------------------------------|-----------------------------------------|-------|-------|-------|--------|---------------|-------------------------------------------------|
|                                | Experiment                              |       |       |       |        |               |                                                 |
|                                | 1                                       | 2     | 3     | 4     | 5      |               |                                                 |
| 2                              | 421.2                                   | 157.5 | 654.1 | 196.6 | 605.5  | 406.9         | 299.3                                           |
| 4                              | 984                                     | 163   | 618.2 | 992.5 | 1215.5 | 794.6         | 829.4                                           |

<sup>1</sup>Percent volume of Triton™ X-100 used in the virion extraction buffer.

<sup>2</sup>GH-LCV infected *C. murale* plants harvested between 7-12 weeks post-transmission by whitefly vectors.
